# Supplementary material
Source: MDPI journal article supplement (https://www.mdpi.com/2073-4433/13/2/313)
Supplement: s1 [file s1]

# Article

# First Long-Time Airborne Fungal Spores Study in Dublin, Ireland (1978–1980)

Moisés Martínez-Bracero <sup>1,\*</sup>, Emma Markey <sup>1</sup>, Jerry Hourihane Clancy <sup>1</sup>, John Sodeau <sup>2</sup> and David J. O'Connor <sup>3</sup>

<sup>1</sup> School of Chemical and Pharmaceutical Sciences, Technological University Dublin, D07 H6K8 Dublin, Ireland; Emma.Markey@TUDublin.ie (E.M.); Jerry.Clancy@TUDublin.ie (J.H.C.)

<sup>2</sup> School of Physical Chemistry, University College Cork, T12 YN60 Cork, Ireland; j.sodeau@ucc.ie

<sup>3</sup> School of Chemical Sciences, Dublin City University, D09 E432 Dublin, Ireland; david.x.oconnor@dcu.ie

\* Correspondence: Moises.MartinezBracero@TUDublin.ie

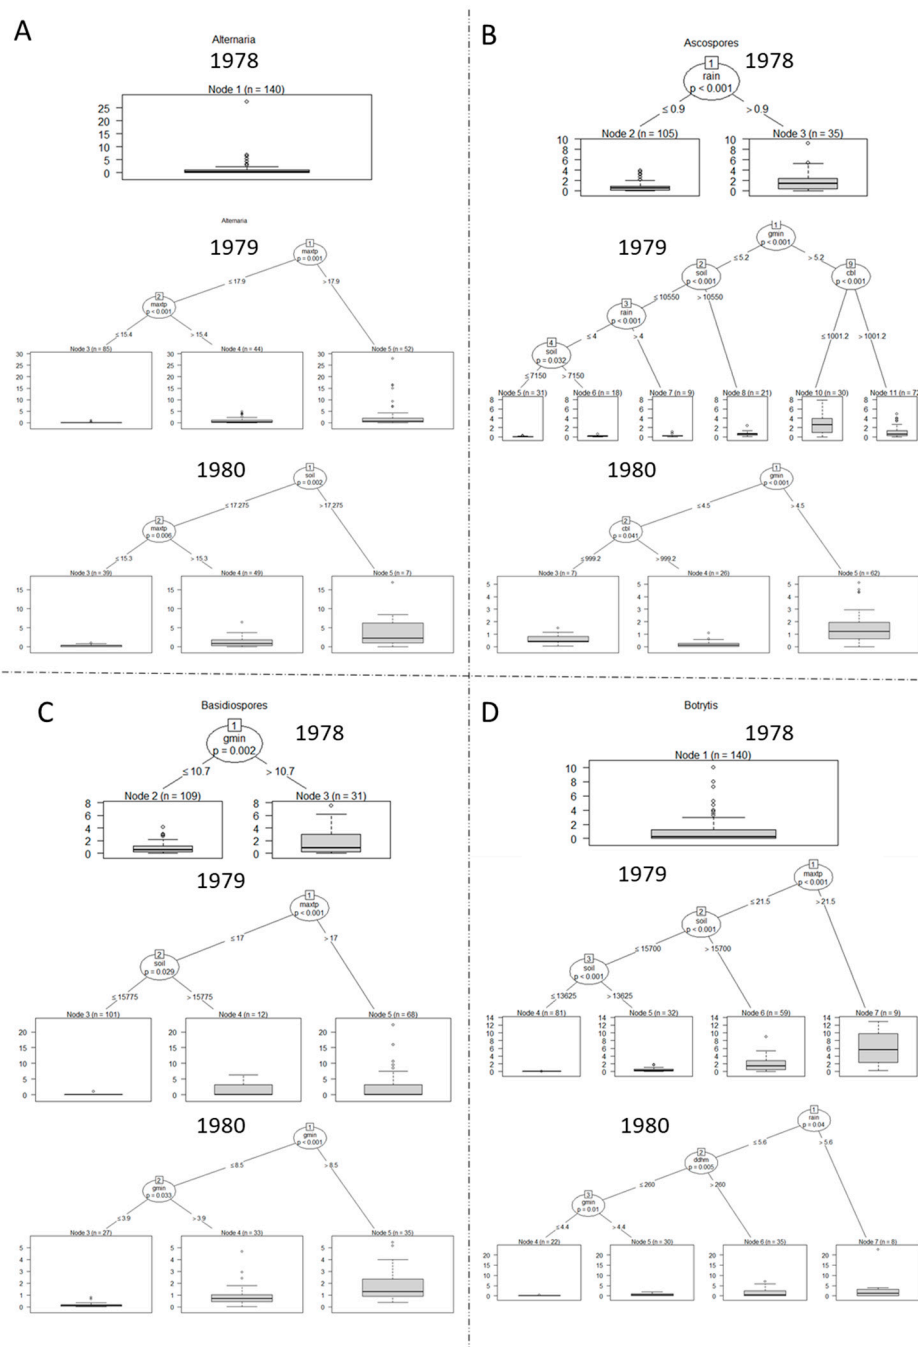

**Citation:** Martínez-Bracero, M.; Markey, E.; Clancy, J.H.; Sodeau, J.; O'Connor, D.J. First Long-Time Airborne Fungal Spores Study in Dublin, Ireland (1978–1980). *Atmosphere* **2022**, *13*, 313. <https://doi.org/10.3390/atmos13020313>

Academic Editors: Estefanía Sánchez Reyes, Manuel Joaquim Sabença Feliciano and José Sánchez-Sánchez

Received: 30 December 2021

Accepted: 8 February 2022

Published: 13 February 2022

**Publisher's Note:** MDPI stays neutral with regard to jurisdictional claims in published maps and institutional affiliations.

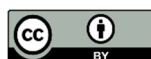

**Copyright:** © 2022 by the authors. Licensee MDPI, Basel, Switzerland. This article is an open access article distributed under the terms and conditions of the Creative Commons Attribution (CC BY) license (<https://creativecommons.org/licenses/by/4.0/>).

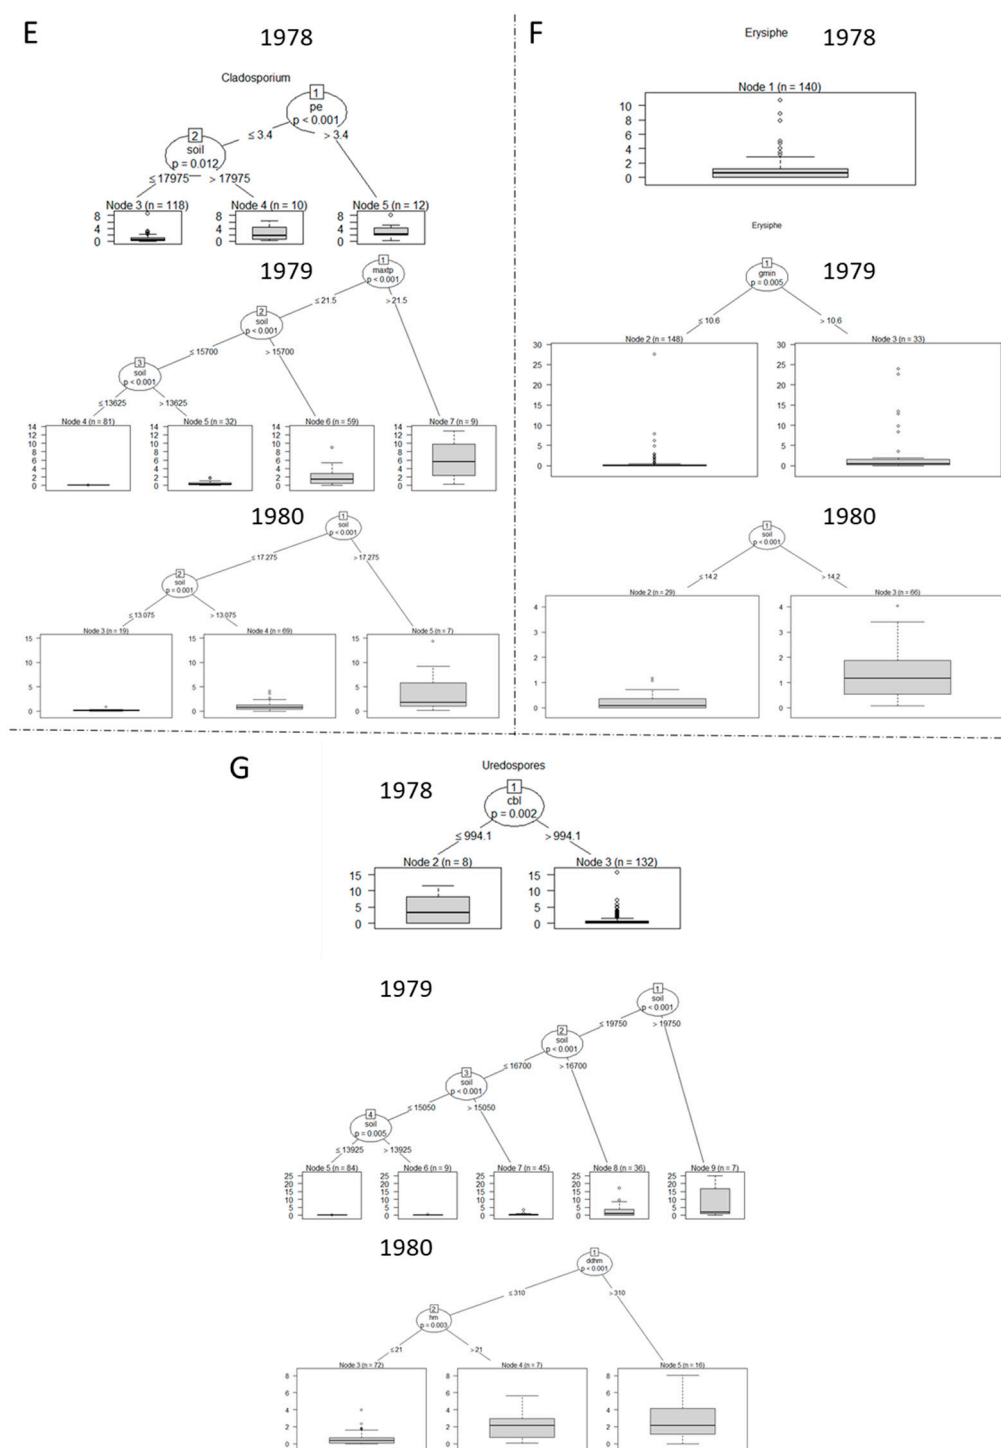

**Figure S1.** Multivariate Regression Trees of (A) Alternaria, (B) Ascospores, (C) Basidiospores, (D) Botrytis, Multivariate Regression Analysis of (E) Cladosporium, (F) Erysiphe, (G) Rust for the three studied years.
